# Supplementary material
Source: Research Square preprint supplement (doi:10.21203/rs.3.rs-9031856/v1)
Supplement: Supplementary file 1 [file f814534847eb356b1726c874.docx]

|  | Df | Sum Sq | Mean Sq | F value | Pr(>F) |
| --- | --- | --- | --- | --- | --- |
| Line | 406 | 9166 | 22.575 | 77.62 | < 2e-16 *** |
| Rep | 2 | 16 | 8.081 | 27.78 | 1.26e-12 *** |
| Residuals | 2000 | 582 | 0.291 |  |  |

**Supplementary Table 1** Analysis of variance (ANOVA) for phenotypic scores of 412 wheat lines measured across three replications. The table shows degrees of freedom (Df), sum of squares (Sum Sq), mean squares (Mean Sq), F values, and significance levels (Pr(>F)) for the effects of genotype (Line), replication (Rep), and residual error. Highly significant effects are indicated by *** (p < 0.001)

---

Signif. codes: 0 ‘***’ 0.001 ‘**’ 0.01 ‘*’ 0.05 ‘.’ 0.1 ‘ ’ 1

**Supplementary Table 2** Descriptive statistics of bacterial leaf streak (BLS) disease scores for 412 wheat genotypes, including mean, mode, median, standard deviation (SD), and standard error (SE).

| **Sr No** | **Line No** | **Mean** | **Mode** | **Median** | **SD** | **SE** |
| --- | --- | --- | --- | --- | --- | --- |
| 1 | TAM-107 | 4.93 | 5.00 | 4.95 | 0.12 | 0.02 |
| 2 | Mattern | 5.17 | 5.20 | 5.20 | 0.15 | 0.02 |
| 3 | Overland | 5.83 | 5.90 | 5.90 | 0.15 | 0.03 |
| 4 | 22Nord-169 | 1.83 | 2.00 | 2.00 | 0.41 | 0.07 |
| 5 | 22Nord-170 | 3.67 | 3.00 | 3.50 | 0.82 | 0.14 |
| 6 | 22Nord-171 | 6.83 | 7.00 | 7.00 | 0.41 | 0.07 |
| 7 | 22Nord-172 | 3.17 | 3.00 | 3.00 | 0.41 | 0.07 |
| 8 | 22Nord-173 | 3.33 | 3.00 | 3.00 | 0.52 | 0.09 |
| 9 | 22Nord-174 | 7.17 | 7.00 | 7.00 | 0.41 | 0.07 |
| 10 | 22Nord-175 | 5.00 | 5.00 | 5.00 | 0.00 | 0.00 |
| 11 | 22Nord-176 | 6.00 | 6.00 | 6.00 | 0.63 | 0.11 |
| 12 | 22Nord-177 | 6.00 | 6.00 | 6.00 | 0.00 | 0.00 |
| 13 | 22Nord-178 | 5.00 | 5.00 | 5.00 | 0.00 | 0.00 |
| 14 | 23SeniorA-20 | 6.67 | 7.00 | 7.00 | 0.52 | 0.09 |
| 15 | 23SeniorA-25 | 5.67 | 6.00 | 6.00 | 0.52 | 0.09 |
| 16 | 23SeniorA-41 | 3.17 | 3.00 | 3.00 | 0.41 | 0.07 |
| 17 | 23SeniorA-47 | 2.33 | 2.00 | 2.00 | 0.52 | 0.09 |
| 18 | 23SeniorA-48 | 2.00 | 2.00 | 2.00 | 0.00 | 0.00 |
| 19 | 23SeniorB-6 | 3.17 | 3.00 | 3.00 | 0.75 | 0.13 |
| 20 | 23SeniorB-7 | 3.00 | 3.00 | 3.00 | 0.00 | 0.00 |
| 21 | 23SeniorB-8 | 3.50 | 3.00 | 3.50 | 0.55 | 0.09 |
| 22 | 23SeniorB-9 | 4.67 | 4.00 | 4.50 | 0.82 | 0.14 |
| 23 | 23SeniorB-12 | 5.00 | 5.00 | 5.00 | 0.89 | 0.15 |
| 24 | 23SeniorB-23 | 3.33 | 3.00 | 3.00 | 0.52 | 0.09 |
| 25 | 23SeniorB-48 | 4.67 | 5.00 | 5.00 | 0.52 | 0.09 |
| 26 | 23SeniorB-49 | 5.33 | 5.00 | 5.00 | 0.52 | 0.09 |
| 27 | 23SeniorC-6 | 4.00 | 4.00 | 4.00 | 0.00 | 0.00 |
| 28 | 23SeniorC-11 | 3.33 | 3.00 | 3.00 | 0.52 | 0.09 |
| 29 | 23SeniorC-29 | 2.67 | 3.00 | 3.00 | 0.52 | 0.09 |
| 30 | 23SeniorC-36 | 1.33 | 1.00 | 1.00 | 0.52 | 0.09 |
| 31 | 23SeniorC-37 | 5.00 | 5.00 | 5.00 | 0.63 | 0.11 |
| 32 | 23SeniorC-40 | 6.00 | 6.00 | 6.00 | 0.00 | 0.00 |
| 33 | 23SeniorC-41 | 5.80 | 6.00 | 6.00 | 0.45 | 0.09 |
| 34 | VA21HRW-2 | 6.00 | 6.00 | 6.00 | 0.00 | 0.00 |
| 35 | VA21HRW-9 | 7.00 | 7.00 | 7.00 | 0.00 | 0.00 |
| 36 | VA21HRW-11 | 6.33 | 6.00 | 6.00 | 0.52 | 0.09 |
| 37 | VA21HRW-12 | 7.17 | 7.00 | 7.00 | 0.41 | 0.07 |
| 38 | VA21HRW-20 | 6.33 | 6.00 | 6.00 | 0.52 | 0.09 |
| 39 | VA21HRW-24 | 4.00 | 4.00 | 4.00 | 0.00 | 0.00 |
| 40 | VA21HRW-29 | 7.33 | 7.00 | 7.00 | 0.52 | 0.09 |
| 41 | VA21HRW-34 | 7.67 | 8.00 | 8.00 | 0.52 | 0.09 |
| 42 | VA21HRW-36 | 6.17 | 6.00 | 6.00 | 0.41 | 0.07 |
| 43 | VA21HRW-37 | 3.50 | 3.00 | 3.00 | 0.84 | 0.14 |
| 44 | VA21HRW-39 | 1.83 | 2.00 | 2.00 | 0.41 | 0.07 |
| 45 | VA21HRW-46 | 3.67 | 4.00 | 4.00 | 0.52 | 0.09 |
| 46 | VA21HRW-47 | 5.33 | 5.00 | 5.00 | 0.52 | 0.09 |
| 47 | VA21HRW-50 | 2.17 | 2.00 | 2.00 | 0.41 | 0.07 |
| 48 | VA21HRW-54 | 3.67 | 4.00 | 4.00 | 0.52 | 0.09 |
| 49 | VA21HRW-58 | 5.17 | 6.00 | 5.50 | 0.98 | 0.16 |
| 50 | VA21HRW-68 | 5.17 | 5.00 | 5.00 | 0.41 | 0.07 |
| 51 | VA21HRW-84 | 4.33 | 4.00 | 4.00 | 0.52 | 0.09 |
| 52 | VA21HRW-85 | 4.17 | 4.00 | 4.00 | 0.75 | 0.13 |
| 53 | VA21HRW-87 | 4.00 | 4.00 | 4.00 | 0.00 | 0.00 |
| 54 | VA21HRW-88 | 5.00 | 5.00 | 5.00 | 0.00 | 0.00 |
| 55 | VA21HRW-90 | 6.17 | 6.00 | 6.00 | 0.41 | 0.07 |
| 56 | VA21HRW-94 | 8.33 | 8.00 | 8.00 | 0.52 | 0.09 |
| 57 | VA21HRW-99 | 6.83 | 7.00 | 7.00 | 0.41 | 0.07 |
| 58 | VA21HRW-100 | 7.00 | 7.00 | 7.00 | 0.00 | 0.00 |
| 59 | VA21HRW-102 | 8.00 | 8.00 | 8.00 | 0.63 | 0.11 |
| 60 | VA21HRW-105 | 8.83 | 9.00 | 9.00 | 0.41 | 0.07 |
| 61 | DH19HRW01-45 | 7.50 | 7.00 | 7.50 | 1.05 | 0.17 |
| 62 | DH19HRW04-21 | 6.83 | 7.00 | 7.00 | 0.41 | 0.07 |
| 63 | DH19HRW04-86 | 8.33 | 8.00 | 8.00 | 0.52 | 0.09 |
| 64 | KS22H19 | 9.00 | 9.00 | 9.00 | 0.00 | 0.00 |
| 65 | KS22H21 | 5.50 | 5.00 | 5.50 | 0.55 | 0.09 |
| 66 | KS22H23 | 9.00 | 9.00 | 9.00 | 0.00 | 0.00 |
| 67 | KS22H28 | 9.00 | 9.00 | 9.00 | 0.00 | 0.00 |
| 68 | KS22H38 | 8.67 | 9.00 | 9.00 | 0.52 | 0.09 |
| 69 | KS22H40 | 9.00 | 9.00 | 9.00 | 0.00 | 0.00 |
| 70 | KS22HW44 | 6.33 | 6.00 | 6.00 | 0.52 | 0.09 |
| 71 | KS22HW54 | 5.67 | 6.00 | 6.00 | 0.52 | 0.09 |
| 72 | KS22H57 | 6.83 | 7.00 | 7.00 | 0.41 | 0.07 |
| 73 | KS22HW60 | 5.67 | 6.00 | 6.00 | 0.52 | 0.09 |
| 74 | KS22H75 | 7.00 | 7.00 | 7.00 | 0.00 | 0.00 |
| 75 | KS22H88 | 7.00 | 7.00 | 7.00 | 0.00 | 0.00 |
| 76 | KS22H89 | 6.67 | 7.00 | 7.00 | 0.52 | 0.09 |
| 77 | KS22H100 | 8.67 | 9.00 | 9.00 | 0.52 | 0.09 |
| 78 | KS22H108 | 9.00 | 9.00 | 9.00 | 0.00 | 0.00 |
| 79 | KS22H112 | 8.33 | 8.00 | 8.00 | 0.52 | 0.09 |
| 80 | KS22HW118 | 8.17 | 8.00 | 8.00 | 0.75 | 0.13 |
| 81 | KS22H126 | 8.50 | 8.00 | 8.50 | 0.55 | 0.09 |
| 82 | KS22H147 | 8.00 | 8.00 | 8.00 | 0.00 | 0.00 |
| 83 | KS22H149 | 7.33 | 8.00 | 8.00 | 1.03 | 0.17 |
| 84 | KS22HW150 | 8.00 | 8.00 | 8.00 | 0.00 | 0.00 |
| 85 | KS22HW152 | 8.00 | 7.00 | 8.00 | 0.89 | 0.15 |
| 86 | KS22HD156 | 6.83 | 7.00 | 7.00 | 0.75 | 0.13 |
| 87 | KS22HD157 | 6.33 | 6.00 | 6.00 | 0.52 | 0.09 |
| 88 | KS22HD158 | 5.00 | 5.00 | 5.00 | 0.00 | 0.00 |
| 89 | KS22H163 | 5.83 | 6.00 | 6.00 | 0.75 | 0.13 |
| 90 | KS22H170 | 6.67 | 7.00 | 7.00 | 0.52 | 0.09 |
| 91 | KS22H172 | 7.33 | 7.00 | 7.00 | 0.52 | 0.09 |
| 92 | KS22HW175 | 8.17 | 8.00 | 8.00 | 0.41 | 0.07 |
| 93 | KS22H178 | 8.67 | 9.00 | 9.00 | 0.52 | 0.09 |
| 94 | BASF-23-23 | 8.50 | 8.00 | 8.50 | 0.55 | 0.09 |
| 95 | BASF-23-24 | 8.00 | 8.00 | 8.00 | 0.00 | 0.00 |
| 96 | BASF-23-1 | 7.00 | 7.00 | 7.00 | 0.00 | 0.00 |
| 97 | BASF-23-22 | 4.00 | 4.00 | 4.00 | 0.63 | 0.11 |
| 98 | BASF-23-12 | 2.33 | 2.00 | 2.00 | 0.52 | 0.09 |
| 99 | BASF-23-6 | 3.33 | 3.00 | 3.00 | 0.52 | 0.09 |
| 100 | BASF-23-3 | 5.83 | 5.00 | 5.50 | 0.98 | 0.16 |
| 101 | BASF-23-18 | 7.00 | 7.00 | 7.00 | 0.00 | 0.00 |
| 102 | BASF-23-10 | 8.50 | 9.00 | 8.50 | 0.55 | 0.09 |
| 103 | BASF-23-4 | 4.83 | 5.00 | 5.00 | 0.41 | 0.07 |
| 104 | BASF-23-11 | 8.33 | 8.00 | 8.00 | 0.52 | 0.09 |
| 105 | BASF-23-19 | 6.33 | 6.00 | 6.00 | 0.52 | 0.09 |
| 106 | BASF-23-14 | 6.83 | 7.00 | 7.00 | 0.41 | 0.07 |
| 107 | BASF-23-20 | 6.00 | 6.00 | 6.00 | 0.00 | 0.00 |
| 108 | BASF-23-8 | 5.17 | 5.00 | 5.00 | 0.41 | 0.07 |
| 109 | BASF-23-17 | 5.00 | 5.00 | 5.00 | 0.63 | 0.11 |
| 110 | BASF-23-9 | 2.75 | 3.00 | 3.00 | 0.50 | 0.13 |
| 111 | BASF-23-15 | 5.00 | 5.00 | 5.00 | 0.00 | 0.00 |
| 112 | BASF-23-16 | 3.33 | 4.00 | 3.50 | 0.82 | 0.14 |
| 113 | BASF-23-2 | 3.00 | 3.00 | 3.00 | 0.00 | 0.00 |
| 114 | BASF-23-21 | 4.67 | 5.00 | 5.00 | 0.52 | 0.09 |
| 115 | BASF-23-5 | 1.83 | 2.00 | 2.00 | 0.75 | 0.13 |
| 116 | BASF-23-13 | 3.00 | 3.00 | 3.00 | 0.00 | 0.00 |
| 117 | BASF-23-7 | 3.50 | 3.00 | 3.50 | 0.55 | 0.09 |
| 118 | TX21M5051 | 2.83 | 3.00 | 3.00 | 0.75 | 0.13 |
| 119 | TX21M5081 | 4.17 | 4.00 | 4.00 | 0.75 | 0.13 |
| 120 | TX21M5090 | 3.33 | 3.00 | 3.00 | 0.52 | 0.09 |
| 121 | TX21M5102 | 3.67 | 4.00 | 4.00 | 0.52 | 0.09 |
| 122 | TX21M5106 | 5.00 | 5.00 | 5.00 | 0.00 | 0.00 |
| 123 | TX21M5110 | 5.33 | 5.00 | 5.00 | 0.52 | 0.09 |
| 124 | TX21M5111 | 1.00 | 1.00 | 1.00 | 0.00 | 0.00 |
| 125 | TX21M5132 | 3.17 | 3.00 | 3.00 | 0.75 | 0.13 |
| 126 | TX21M5141 | 3.00 | 2.00 | 3.00 | 0.89 | 0.15 |
| 127 | TX21M5145 | 3.00 | 2.00 | 3.00 | 0.89 | 0.15 |
| 128 | TX21M5167 | 3.17 | 3.00 | 3.00 | 0.41 | 0.07 |
| 129 | TX21M5175 | 2.67 | 3.00 | 3.00 | 0.52 | 0.09 |
| 130 | TX21M5184 | 2.50 | 2.00 | 2.00 | 0.84 | 0.14 |
| 131 | TX21M5202 | 4.00 | 5.00 | 4.00 | 0.89 | 0.15 |
| 132 | TX21M5311 | 2.17 | 2.00 | 2.00 | 0.75 | 0.13 |
| 133 | TX21M5327 | 3.17 | 3.00 | 3.00 | 0.41 | 0.07 |
| 134 | TX21M5358 | 3.33 | 4.00 | 4.00 | 1.03 | 0.17 |
| 135 | TX21M5362 | 2.33 | 2.00 | 2.00 | 0.52 | 0.09 |
| 136 | TX21M5390 | 2.83 | 3.00 | 3.00 | 0.41 | 0.07 |
| 137 | TX21M5440 | 1.17 | 1.00 | 1.00 | 0.41 | 0.07 |
| 138 | TX21M5443 | 3.00 | 2.00 | 3.00 | 0.89 | 0.15 |
| 139 | TX21M5445 | 4.33 | 4.00 | 4.00 | 0.52 | 0.09 |
| 140 | TX21M5477 | 1.67 | 2.00 | 2.00 | 0.52 | 0.09 |
| 141 | TX21M5528 | 2.00 | 2.00 | 2.00 | 0.00 | 0.00 |
| 142 | TX21M5615 | 4.33 | 4.00 | 4.00 | 0.52 | 0.09 |
| 143 | TX21M5621 | 3.17 | 3.00 | 3.00 | 1.17 | 0.19 |
| 144 | TX21M5629 | 1.67 | 2.00 | 2.00 | 0.52 | 0.09 |
| 145 | TX21M5632 | 2.33 | 2.00 | 2.00 | 0.52 | 0.09 |
| 146 | TX21M5634 | 2.33 | 2.00 | 2.00 | 1.03 | 0.17 |
| 147 | TX21M5652 | 6.00 | 6.00 | 6.00 | 0.00 | 0.00 |
| 148 | CO19S053R | 5.00 | 5.00 | 5.00 | 0.00 | 0.00 |
| 149 | CO19S135W | 4.00 | 4.00 | 4.00 | 0.00 | 0.00 |
| 150 | CO20D036R | 2.00 | 2.00 | 2.00 | 0.63 | 0.11 |
| 151 | CO20D045R | 1.83 | 2.00 | 2.00 | 0.75 | 0.13 |
| 152 | CO20D058W | 2.83 | 3.00 | 3.00 | 0.41 | 0.07 |
| 153 | CO20D068W | 2.00 | 2.00 | 2.00 | 0.00 | 0.00 |
| 154 | CO20D073W | 5.00 | 5.00 | 5.00 | 0.00 | 0.00 |
| 155 | CO20D079R | 3.67 | 3.00 | 3.00 | 1.03 | 0.17 |
| 156 | CO20D097R | 4.00 | 4.00 | 4.00 | 0.00 | 0.00 |
| 157 | CO20D108R | 2.17 | 3.00 | 2.50 | 0.98 | 0.16 |
| 158 | CO20D112R | 3.17 | 3.00 | 3.00 | 0.41 | 0.07 |
| 159 | CO200034R | 1.67 | 2.00 | 2.00 | 0.52 | 0.09 |
| 160 | CO200030R | 2.67 | 3.00 | 3.00 | 0.52 | 0.09 |
| 161 | CO200037R | 4.00 | 4.00 | 4.00 | 0.00 | 0.00 |
| 162 | CO20SF095R | 4.00 | 4.00 | 4.00 | 0.00 | 0.00 |
| 163 | CO20SF227R | 1.17 | 1.00 | 1.00 | 0.41 | 0.07 |
| 164 | CO20SF240R | 4.83 | 5.00 | 5.00 | 0.75 | 0.13 |
| 165 | CO20SF160R | 2.33 | 2.00 | 2.00 | 0.52 | 0.09 |
| 166 | CO20SF163R | 1.40 | 1.00 | 1.00 | 0.55 | 0.11 |
| 167 | CO20SF192R | 4.33 | 4.00 | 4.00 | 0.52 | 0.09 |
| 168 | CO20SF198R | 4.83 | 5.00 | 5.00 | 0.41 | 0.07 |
| 169 | CO20SFD043R | 4.67 | 5.00 | 5.00 | 0.52 | 0.09 |
| 170 | CO20SFD033W | 4.17 | 4.00 | 4.00 | 0.41 | 0.07 |
| 171 | CO20SFD071R | 4.00 | 3.00 | 4.00 | 0.89 | 0.15 |
| 172 | CO20SFD011R | 4.50 | 4.00 | 4.50 | 0.55 | 0.09 |
| 173 | CO20SFD013R | 7.00 | 7.00 | 7.00 | 0.00 | 0.00 |
| 174 | CO20SFD019R | 4.33 | 4.00 | 4.00 | 0.52 | 0.09 |
| 175 | CO20SFD020R | 6.67 | 7.00 | 7.00 | 0.52 | 0.09 |
| 176 | CO20SF014W | 4.33 | 4.00 | 4.00 | 0.52 | 0.09 |
| 177 | CO20SF141R | 3.50 | 3.00 | 3.50 | 0.55 | 0.09 |
| 178 | TX20A001005 | 3.00 | 3.00 | 3.00 | 0.00 | 0.00 |
| 179 | TX20A001031 | 8.17 | 8.00 | 8.00 | 0.41 | 0.07 |
| 180 | TX20A001092 | 4.33 | 4.00 | 4.00 | 0.52 | 0.09 |
| 181 | TX20A001093 | 3.33 | 3.00 | 3.00 | 0.52 | 0.09 |
| 182 | TX20A001094 | 5.33 | 5.00 | 5.00 | 0.52 | 0.09 |
| 183 | TX20A001107 | 6.17 | 6.00 | 6.00 | 0.41 | 0.07 |
| 184 | TX20A001135 | 2.50 | 2.00 | 2.00 | 0.84 | 0.14 |
| 185 | TX20A001137 | 3.33 | 4.00 | 3.50 | 0.82 | 0.14 |
| 186 | TX20A001171 | 5.83 | 6.00 | 6.00 | 0.75 | 0.13 |
| 187 | TX20A001189 | 7.33 | 8.00 | 7.50 | 0.82 | 0.14 |
| 188 | TX20A001194W | 7.50 | 7.00 | 7.50 | 0.55 | 0.09 |
| 189 | TX20A001209 | 6.67 | 7.00 | 7.00 | 0.52 | 0.09 |
| 190 | TX20A001307 | 7.00 | 7.00 | 7.00 | 0.00 | 0.00 |
| 191 | TX20A001323 | 6.33 | 6.00 | 6.00 | 0.52 | 0.09 |
| 192 | TX20A001377 | 8.00 | 8.00 | 8.00 | 0.00 | 0.00 |
| 193 | TX18DH77 | 6.83 | 7.00 | 7.00 | 0.75 | 0.13 |
| 194 | TX18DH170 | 6.67 | 7.00 | 7.00 | 0.52 | 0.09 |
| 195 | TX18DH265 | 7.00 | 5.00 | 7.00 | 1.79 | 0.30 |
| 196 | TX18DH267 | 7.00 | 7.00 | 7.00 | 0.00 | 0.00 |
| 197 | TX18DH278 | 8.33 | 8.00 | 8.00 | 0.52 | 0.09 |
| 198 | TX18DH319 | 8.83 | 9.00 | 9.00 | 0.41 | 0.07 |
| 199 | TX18DH370 | 8.00 | 8.00 | 8.00 | 0.00 | 0.00 |
| 200 | TX18DH389 | 7.75 | 8.00 | 8.00 | 0.50 | 0.13 |
| 201 | TX18DH463 | 7.00 | 7.00 | 7.00 | 0.00 | 0.00 |
| 202 | TX18DH496 | 7.67 | 8.00 | 8.00 | 0.52 | 0.09 |
| 203 | TX18DH498 | 8.00 | 9.00 | 8.00 | 0.89 | 0.15 |
| 204 | TX18DH507 | 8.83 | 9.00 | 9.00 | 0.41 | 0.07 |
| 205 | TX21A001076 | 7.67 | 8.00 | 8.00 | 0.52 | 0.09 |
| 206 | TX21A001081 | 8.00 | 8.00 | 8.00 | 0.00 | 0.00 |
| 207 | TX21A001384 | 7.17 | 7.00 | 7.00 | 0.41 | 0.07 |
| 208 | KS130060C-2 | 7.00 | 7.00 | 7.00 | 0.63 | 0.11 |
| 209 | KS130459C-4 | 8.17 | 8.00 | 8.00 | 0.41 | 0.07 |
| 210 | KS140068C-6 | 4.33 | 6.00 | 5.50 | 2.25 | 0.38 |
| 211 | KS140535C-7 | 6.67 | 7.00 | 7.00 | 0.52 | 0.09 |
| 212 | KS140064M-6 | 7.83 | 8.00 | 8.00 | 0.41 | 0.07 |
| 213 | KS170025D-11 | 7.17 | 7.00 | 7.00 | 0.41 | 0.07 |
| 214 | KS170025D-1 | 3.00 | 1.00 | 2.00 | 2.37 | 0.39 |
| 215 | KS160765S-6 | 9.00 | 9.00 | 9.00 | 0.00 | 0.00 |
| 216 | KS170013D-16 | 7.67 | 8.00 | 8.00 | 0.52 | 0.09 |
| 217 | KS160476S-9 | 6.33 | 6.00 | 6.00 | 0.52 | 0.09 |
| 218 | KS160855S-4 | 7.00 | 7.00 | 7.00 | 0.00 | 0.00 |
| 219 | KS160352S-1 | 6.67 | 7.00 | 7.00 | 0.52 | 0.09 |
| 220 | KS160786S-4 | 6.33 | 7.00 | 6.50 | 0.82 | 0.14 |
| 221 | KS170778S-2 | 7.67 | 8.00 | 8.00 | 0.52 | 0.09 |
| 222 | KS170778S-5 | 7.00 | 7.00 | 7.00 | 0.00 | 0.00 |
| 223 | KS170778S-6 | 6.67 | 7.00 | 7.00 | 0.52 | 0.09 |
| 224 | KS170778S-8 | 7.00 | 7.00 | 7.00 | 0.00 | 0.00 |
| 225 | KS150167-15 | 5.33 | 5.00 | 5.00 | 0.52 | 0.09 |
| 226 | KS150167-18 | 6.80 | 7.00 | 7.00 | 0.45 | 0.09 |
| 227 | KS150720-6 | 6.33 | 6.00 | 6.00 | 0.52 | 0.09 |
| 228 | KS150765-4 | 9.00 | 9.00 | 9.00 | 0.00 | 0.00 |
| 229 | KS150765-6 | 7.33 | 7.00 | 7.00 | 0.52 | 0.09 |
| 230 | KS170118S-1 | 6.00 | 6.00 | 6.00 | 0.00 | 0.00 |
| 231 | KS170364S-3 | 6.67 | 7.00 | 7.00 | 0.52 | 0.09 |
| 232 | KS170412S-2 | 7.33 | 7.00 | 7.00 | 0.52 | 0.09 |
| 233 | KS170453S-1 | 7.50 | 7.00 | 7.50 | 0.55 | 0.09 |
| 234 | KS170453S-3 | 6.67 | 6.00 | 6.00 | 1.03 | 0.17 |
| 235 | KS170569S-5 | 4.17 | 4.00 | 4.00 | 0.41 | 0.07 |
| 236 | KS170684S-6 | 6.00 | 6.00 | 6.00 | 0.00 | 0.00 |
| 237 | KS170684S-11 | 4.33 | 4.00 | 4.00 | 0.52 | 0.09 |
| 238 | KS22U2017013.G43 | 8.33 | 8.00 | 8.00 | 0.52 | 0.09 |
| 239 | KS22U2017023.G40 | 7.00 | 7.00 | 7.00 | 0.00 | 0.00 |
| 240 | KS22U7269.F11.C10 | 6.00 | 6.00 | 6.00 | 0.89 | 0.15 |
| 241 | KS22U7487.G49 | 5.33 | 5.00 | 5.00 | 0.52 | 0.09 |
| 242 | KS22U7487.G57 | 4.33 | 4.00 | 4.00 | 0.52 | 0.09 |
| 243 | KS22U7494.E11.C7 | 3.00 | 3.00 | 3.00 | 0.00 | 0.00 |
| 244 | KS22U8191.A.3.1 | 2.17 | 2.00 | 2.00 | 0.41 | 0.07 |
| 245 | KS22U8313.K.2.1 | 7.00 | 7.00 | 7.00 | 0.00 | 0.00 |
| 246 | KS22U8345.B.4.0 | 7.00 | 7.00 | 7.00 | 0.63 | 0.11 |
| 247 | KS22U8186.C.16.1 | 2.67 | 2.00 | 2.00 | 1.03 | 0.17 |
| 248 | KS22U8054.12 | 6.67 | 7.00 | 7.00 | 0.52 | 0.09 |
| 249 | KS22U7907.13.RS002 | 3.17 | 3.00 | 3.00 | 0.41 | 0.07 |
| 250 | KS22U8520.P.3 | 5.33 | 6.00 | 6.00 | 1.03 | 0.17 |
| 251 | KS22U7710.E.2.2 | 6.00 | 6.00 | 6.00 | 0.00 | 0.00 |
| 252 | KS22U8581.F.5.8 | 7.00 | 7.00 | 7.00 | 0.00 | 0.00 |
| 253 | KS22U8578.P.A7.A012 | 5.83 | 7.00 | 6.50 | 1.47 | 0.25 |
| 254 | KS22U8314.F.A1.A005 | 6.00 | 6.00 | 6.00 | 0.00 | 0.00 |
| 255 | KS22U8344.I.8.2 | 7.00 | 7.00 | 7.00 | 0.00 | 0.00 |
| 256 | KS22U8314.M.A8.T7 | 3.33 | 3.00 | 3.00 | 0.52 | 0.09 |
| 257 | KS22U8492.F.T4 | 4.00 | 4.00 | 4.00 | 0.00 | 0.00 |
| 258 | KS22U8578.E.A1.H20.11 | 5.00 | 5.00 | 5.00 | 0.00 | 0.00 |
| 259 | KS22U8654.H.A06.T9 | 6.67 | 7.00 | 7.00 | 0.52 | 0.09 |
| 260 | KS22U8578.K.A2.A20.1 | 6.33 | 6.00 | 6.00 | 0.52 | 0.09 |
| 261 | KS22U8693.E.6.T8 | 4.33 | 4.00 | 4.00 | 0.52 | 0.09 |
| 262 | KS22U8790.J.T1 | 6.33 | 6.00 | 6.00 | 0.52 | 0.09 |
| 263 | KS22U8707.H.14.T28 | 6.83 | 7.00 | 7.00 | 0.41 | 0.07 |
| 264 | KS22U8712.O.C07.T8 | 6.33 | 7.00 | 7.00 | 1.03 | 0.17 |
| 265 | KS22U7715.R1.1G.10R | 7.67 | 8.00 | 8.00 | 0.52 | 0.09 |
| 266 | KS22U6864.1H.1R.R2.A1 | 2.00 | 2.00 | 2.00 | 0.00 | 0.00 |
| 267 | KS22U20F037.R2 | 4.33 | 4.00 | 4.00 | 0.52 | 0.09 |
| 268 | KS22U8191.A.21.1 | 4.00 | 4.00 | 4.00 | 0.00 | 0.00 |
| 269 | KS22U8492.J.T1 | 5.00 | 5.00 | 5.00 | 0.00 | 0.00 |
| 270 | KS22U7710.O.6 | 7.00 | 7.00 | 7.00 | 0.00 | 0.00 |
| 271 | KS22U8191.A.6.1 | 6.67 | 7.00 | 7.00 | 0.52 | 0.09 |
| 272 | KS22U7907.13.RS001 | 5.00 | 5.00 | 5.00 | 0.00 | 0.00 |
| 273 | OK16107157-14CRHf17 | 6.83 | 7.00 | 7.00 | 0.75 | 0.13 |
| 274 | OK18217-19HR-4 | 3.17 | 3.00 | 3.00 | 0.41 | 0.07 |
| 275 | OK198509 | 5.50 | 5.00 | 5.50 | 0.55 | 0.09 |
| 276 | OK19225 | 3.33 | 3.00 | 3.00 | 0.52 | 0.09 |
| 277 | OK19131-3C22 | 6.67 | 7.00 | 7.00 | 0.52 | 0.09 |
| 278 | OK19235-21HR-1 | 5.50 | 6.00 | 5.50 | 0.55 | 0.09 |
| 279 | OK20D87014 | 6.50 | 6.00 | 6.50 | 0.55 | 0.09 |
| 280 | OK20D88025F | 3.67 | 4.00 | 4.00 | 0.52 | 0.09 |
| 281 | OK2089183 | 4.00 | 4.00 | 4.00 | 0.63 | 0.11 |
| 282 | OK20105 | 6.67 | 7.00 | 7.00 | 0.52 | 0.09 |
| 283 | OK21227 | 5.60 | 6.00 | 6.00 | 0.89 | 0.18 |
| 284 | OK20418-20HR-5 | 6.00 | 6.00 | 6.00 | 0.00 | 0.00 |
| 285 | OK20418-20HR-8 | 5.50 | 5.00 | 5.50 | 0.58 | 0.14 |
| 286 | OK20418-20HR-15 | 5.17 | 5.00 | 5.00 | 0.41 | 0.07 |
| 287 | OK20418-20HR-16 | 5.00 | 5.00 | 5.00 | 0.00 | 0.00 |
| 288 | OK21DTR1705-91 | 7.17 | 7.00 | 7.00 | 0.41 | 0.07 |
| 289 | OK21DTR1722-16W | 9.00 | 9.00 | 9.00 | 0.00 | 0.00 |
| 290 | OK21DTR1722-62 | 7.00 | 7.00 | 7.00 | 0.00 | 0.00 |
| 291 | OK21DTR1704-90 | 7.50 | 7.00 | 7.50 | 0.55 | 0.09 |
| 292 | OK21DTR1710-18 | 4.33 | 4.00 | 4.00 | 0.82 | 0.14 |
| 293 | OK21DTR1712-56 | 3.00 | 3.00 | 3.00 | 0.00 | 0.00 |
| 294 | OK21DTR1712-66 | 5.33 | 5.00 | 5.00 | 0.52 | 0.09 |
| 295 | OK21DTR1712-76 | 3.67 | 4.00 | 4.00 | 0.52 | 0.09 |
| 296 | OK21DTR1712-111 | 4.00 | 4.00 | 4.00 | 0.00 | 0.00 |
| 297 | OK21DTR1712-112 | 7.00 | 7.00 | 7.00 | 0.00 | 0.00 |
| 298 | OK21DTR1713-69 | 7.33 | 7.00 | 7.00 | 0.52 | 0.09 |
| 299 | OK21DTR1714-90 | 7.00 | 7.00 | 7.00 | 0.00 | 0.00 |
| 300 | OK21DTR1715-4 | 5.50 | 6.00 | 5.50 | 0.55 | 0.09 |
| 301 | OK21DTR1721-182 | 7.00 | 7.00 | 7.00 | 0.00 | 0.00 |
| 302 | OK21DTR1721-176W | 6.00 | 6.00 | 6.00 | 0.00 | 0.00 |
| 303 | NSF22102 | 5.33 | 5.00 | 5.00 | 0.52 | 0.09 |
| 304 | NSF22113 | 8.00 | 8.00 | 8.00 | 0.00 | 0.00 |
| 305 | NSF22115 | 6.67 | 7.00 | 7.00 | 0.52 | 0.09 |
| 306 | NSF22121 | 5.33 | 5.00 | 5.00 | 0.52 | 0.09 |
| 307 | NE21668 | 6.83 | 7.00 | 7.00 | 0.41 | 0.07 |
| 308 | NSF22114 | 5.00 | 5.00 | 5.00 | 0.00 | 0.00 |
| 309 | NSF22117 | 7.33 | 7.00 | 7.00 | 0.52 | 0.09 |
| 310 | NSF22105 | 5.50 | 6.00 | 6.00 | 1.22 | 0.20 |
| 311 | NSF22124 | 8.67 | 9.00 | 9.00 | 0.52 | 0.09 |
| 312 | NSF22110 | 8.00 | 8.00 | 8.00 | 0.00 | 0.00 |
| 313 | NE21511 | 7.67 | 8.00 | 8.00 | 0.52 | 0.09 |
| 314 | NE21469 | 7.00 | 7.00 | 7.00 | 0.00 | 0.00 |
| 315 | NE21431 | 8.00 | 8.00 | 8.00 | 0.00 | 0.00 |
| 316 | NE21420 | 7.33 | 7.00 | 7.00 | 0.52 | 0.09 |
| 317 | NE21464 | 7.67 | 8.00 | 8.00 | 0.52 | 0.09 |
| 318 | NEB-152-48 | 7.33 | 7.00 | 7.00 | 0.52 | 0.09 |
| 319 | NE21460 | 6.33 | 6.00 | 6.00 | 0.52 | 0.09 |
| 320 | NE21466 | 6.33 | 6.00 | 6.00 | 0.52 | 0.09 |
| 321 | NHH21441 | 6.33 | 6.00 | 6.00 | 0.52 | 0.09 |
| 322 | NE21545 | 5.00 | 5.00 | 5.00 | 0.00 | 0.00 |
| 323 | NE21579 | 7.33 | 7.00 | 7.00 | 0.52 | 0.09 |
| 324 | NE21504 | 6.50 | 7.00 | 6.50 | 0.55 | 0.09 |
| 325 | NEB-148-42 | 6.33 | 6.00 | 6.00 | 0.52 | 0.09 |
| 326 | NE21658 | 8.00 | 8.00 | 8.00 | 0.00 | 0.00 |
| 327 | NE21410 | 6.67 | 7.00 | 7.00 | 0.52 | 0.09 |
| 328 | NE21656 | 4.33 | 4.00 | 4.00 | 0.52 | 0.09 |
| 329 | NE21489 | 6.67 | 7.00 | 7.00 | 0.52 | 0.09 |
| 330 | NEB-144-22 | 5.00 | 5.00 | 5.00 | 0.00 | 0.00 |
| 331 | NE21503 | 5.83 | 6.00 | 6.00 | 0.41 | 0.07 |
| 332 | NE21559 | 7.00 | 7.00 | 7.00 | 0.00 | 0.00 |
| 333 | MTFH20163 | 8.00 | 8.00 | 8.00 | 0.00 | 0.00 |
| 334 | MTS2110 | 7.00 | 7.00 | 7.00 | 0.00 | 0.00 |
| 335 | MT2128 | 6.67 | 7.00 | 7.00 | 0.52 | 0.09 |
| 336 | MTV2167 | 5.00 | 5.00 | 5.00 | 0.00 | 0.00 |
| 337 | MTV2168 | 5.67 | 6.00 | 6.00 | 0.52 | 0.09 |
| 338 | MT2172 | 5.17 | 5.00 | 5.00 | 0.41 | 0.07 |
| 339 | MT2178 | 7.00 | 7.00 | 7.00 | 0.00 | 0.00 |
| 340 | MTS21108 | 9.00 | 9.00 | 9.00 | 0.00 | 0.00 |
| 341 | MTAX21187 | 7.67 | 8.00 | 8.00 | 0.52 | 0.09 |
| 342 | MT19175 | 7.83 | 8.00 | 8.00 | 0.41 | 0.07 |
| 343 | SD18B017-6 | 5.33 | 5.00 | 5.00 | 0.52 | 0.09 |
| 344 | SD18B134-16 | 5.00 | 5.00 | 5.00 | 0.00 | 0.00 |
| 345 | SD19B004-1 | 7.33 | 7.00 | 7.00 | 0.52 | 0.09 |
| 346 | SD19B089-3 | 8.00 | 8.00 | 8.00 | 0.00 | 0.00 |
| 347 | SD20B006-2 | 6.33 | 6.00 | 6.00 | 0.52 | 0.09 |
| 348 | SD20B007-8 | 5.33 | 5.00 | 5.00 | 0.52 | 0.09 |
| 349 | SD20B010-4 | 5.83 | 6.00 | 6.00 | 0.41 | 0.07 |
| 350 | SD20B012-1 | 4.33 | 4.00 | 4.00 | 0.52 | 0.09 |
| 351 | SD20B027-1 | 5.33 | 5.00 | 5.00 | 0.52 | 0.09 |
| 352 | SD20B046-1 | 3.17 | 3.00 | 3.00 | 0.41 | 0.07 |
| 353 | SD20B057-1 | 4.33 | 4.00 | 4.00 | 0.52 | 0.09 |
| 354 | SD20B070-5 | 6.67 | 7.00 | 7.00 | 0.52 | 0.09 |
| 355 | SD20B085-1W | 5.17 | 5.00 | 5.00 | 0.41 | 0.07 |
| 356 | SD20B086-1 | 5.17 | 5.00 | 5.00 | 0.75 | 0.13 |
| 357 | SD20B098-5 | 6.67 | 7.00 | 7.00 | 0.52 | 0.09 |
| 358 | SD20B120-2 | 7.00 | 7.00 | 7.00 | 0.00 | 0.00 |
| 359 | SD20B134-4 | 6.00 | 6.00 | 6.00 | 0.00 | 0.00 |
| 360 | SD20B140-6 | 4.33 | 4.00 | 4.00 | 0.52 | 0.09 |
| 361 | SD20C031-1 | 6.67 | 7.00 | 7.00 | 0.52 | 0.09 |
| 362 | SD20D009-9 | 6.00 | 6.00 | 6.00 | 0.63 | 0.11 |
| 363 | SD20D016-3 | 4.67 | 5.00 | 5.00 | 0.52 | 0.09 |
| 364 | SD20D030-1 | 5.83 | 6.00 | 6.00 | 0.41 | 0.07 |
| 365 | SD20D031-4 | 3.00 | 3.00 | 3.00 | 0.00 | 0.00 |
| 366 | SD20D042-5 | 6.50 | 7.00 | 6.50 | 0.55 | 0.09 |
| 367 | SD20D046-6 | 8.33 | 8.00 | 8.00 | 0.52 | 0.09 |
| 368 | SD20D063-2W | 7.00 | 7.00 | 7.00 | 0.00 | 0.00 |
| 369 | SD20D064-3 | 6.17 | 6.00 | 6.00 | 0.41 | 0.07 |
| 370 | SD20D064-4 | 9.00 | 9.00 | 9.00 | 0.00 | 0.00 |
| 371 | SD20D101-1 | 8.50 | 9.00 | 8.50 | 0.55 | 0.09 |
| 372 | SD20D108-6 | 9.00 | 9.00 | 9.00 | 0.00 | 0.00 |
| 373 | TXGT2243 | 8.67 | 9.00 | 9.00 | 0.52 | 0.09 |
| 374 | TXGT22266 | 8.17 | 8.00 | 8.00 | 0.41 | 0.07 |
| 375 | TXGT22289 | 8.00 | 8.00 | 8.00 | 0.63 | 0.11 |
| 376 | TXGT22296 | 7.67 | 8.00 | 8.00 | 0.52 | 0.09 |
| 377 | TXGT2D23 | 7.67 | 8.00 | 8.00 | 0.58 | 0.19 |
| 378 | TXGT2D28 | 5.83 | 6.00 | 6.00 | 0.75 | 0.13 |
| 379 | TXGT2D146 | 6.50 | 6.00 | 6.50 | 0.58 | 0.14 |
| 380 | TXGT2D203 | 6.67 | 7.00 | 7.00 | 0.58 | 0.19 |
| 381 | TXGT2D237 | 4.25 | 5.00 | 4.50 | 0.96 | 0.24 |
| 382 | TXGT2D243 | 7.00 | 7.00 | 7.00 | 0.00 | 0.00 |
| 383 | TXGT2D279 | 5.00 | #N/A | 5.00 | 1.00 | 0.33 |
| 384 | TXGT2D322 | 7.33 | 7.00 | 7.00 | 0.52 | 0.09 |
| 385 | TXGT2D333 | 4.83 | 5.00 | 5.00 | 0.75 | 0.13 |
| 386 | TXGT3G20 | 7.67 | 8.00 | 8.00 | 0.52 | 0.09 |
| 387 | TXGT3G64 | 8.83 | 9.00 | 9.00 | 0.41 | 0.07 |
| 388 | TXGT3G38 | 8.67 | 9.00 | 9.00 | 0.52 | 0.09 |
| 389 | TXGT3G115 | 7.50 | 7.00 | 7.50 | 0.55 | 0.09 |
| 390 | TXGT3G127 | 6.67 | 7.00 | 7.00 | 0.52 | 0.09 |
| 391 | TXGT3G217 | 8.50 | 8.00 | 8.50 | 0.55 | 0.09 |
| 392 | TXGT3G234 | 7.50 | 7.00 | 7.50 | 0.55 | 0.09 |
| 393 | TXGT3G252 | 6.67 | 7.00 | 7.00 | 0.52 | 0.09 |
| 394 | TXGT4I65 | 6.17 | 6.00 | 6.00 | 0.41 | 0.07 |
| 395 | TXGT4I84 | 7.00 | 7.00 | 7.00 | 0.00 | 0.00 |
| 396 | TXGT4I105 | 6.33 | 6.00 | 6.00 | 0.52 | 0.09 |
| 397 | TXGT4I115 | 6.00 | 6.00 | 6.00 | 0.63 | 0.11 |
| 398 | TXGT4I126 | 6.33 | 6.00 | 6.00 | 0.52 | 0.09 |
| 399 | TXGT4I133 | 8.33 | 8.00 | 8.00 | 0.52 | 0.09 |
| 400 | TXGT4I268 | 6.00 | 5.00 | 6.00 | 0.89 | 0.15 |
| 401 | TXGT4I163 | 7.67 | 8.00 | 8.00 | 0.52 | 0.09 |
| 402 | TXGT4I256 | 6.67 | 7.00 | 7.00 | 0.52 | 0.09 |
| 403 | N22MD9044 | 6.33 | 7.00 | 7.00 | 1.03 | 0.17 |
| 404 | N22MD4106 | 8.67 | 9.00 | 9.00 | 0.52 | 0.09 |
| 405 | N22MD1160 | 6.67 | 7.00 | 7.00 | 0.52 | 0.09 |
| 406 | N22MD1159 | 5.33 | 5.00 | 5.00 | 0.52 | 0.09 |
| 407 | N22MD6066 | 6.67 | 7.00 | 7.00 | 0.52 | 0.09 |
| 408 | N22MD3020 | 6.33 | 6.00 | 6.00 | 0.52 | 0.09 |
| 409 | N22MD4018 | 8.67 | 9.00 | 9.00 | 0.52 | 0.09 |
| 410 | N22MD6101 | 9.00 | 9.00 | 9.00 | 0.00 | 0.00 |
| 411 | N22MD1144 | 7.83 | 9.00 | 8.00 | 1.17 | 0.19 |
| 412 | N22MD6075 | 6.50 | 6.00 | 6.50 | 0.55 | 0.09 |


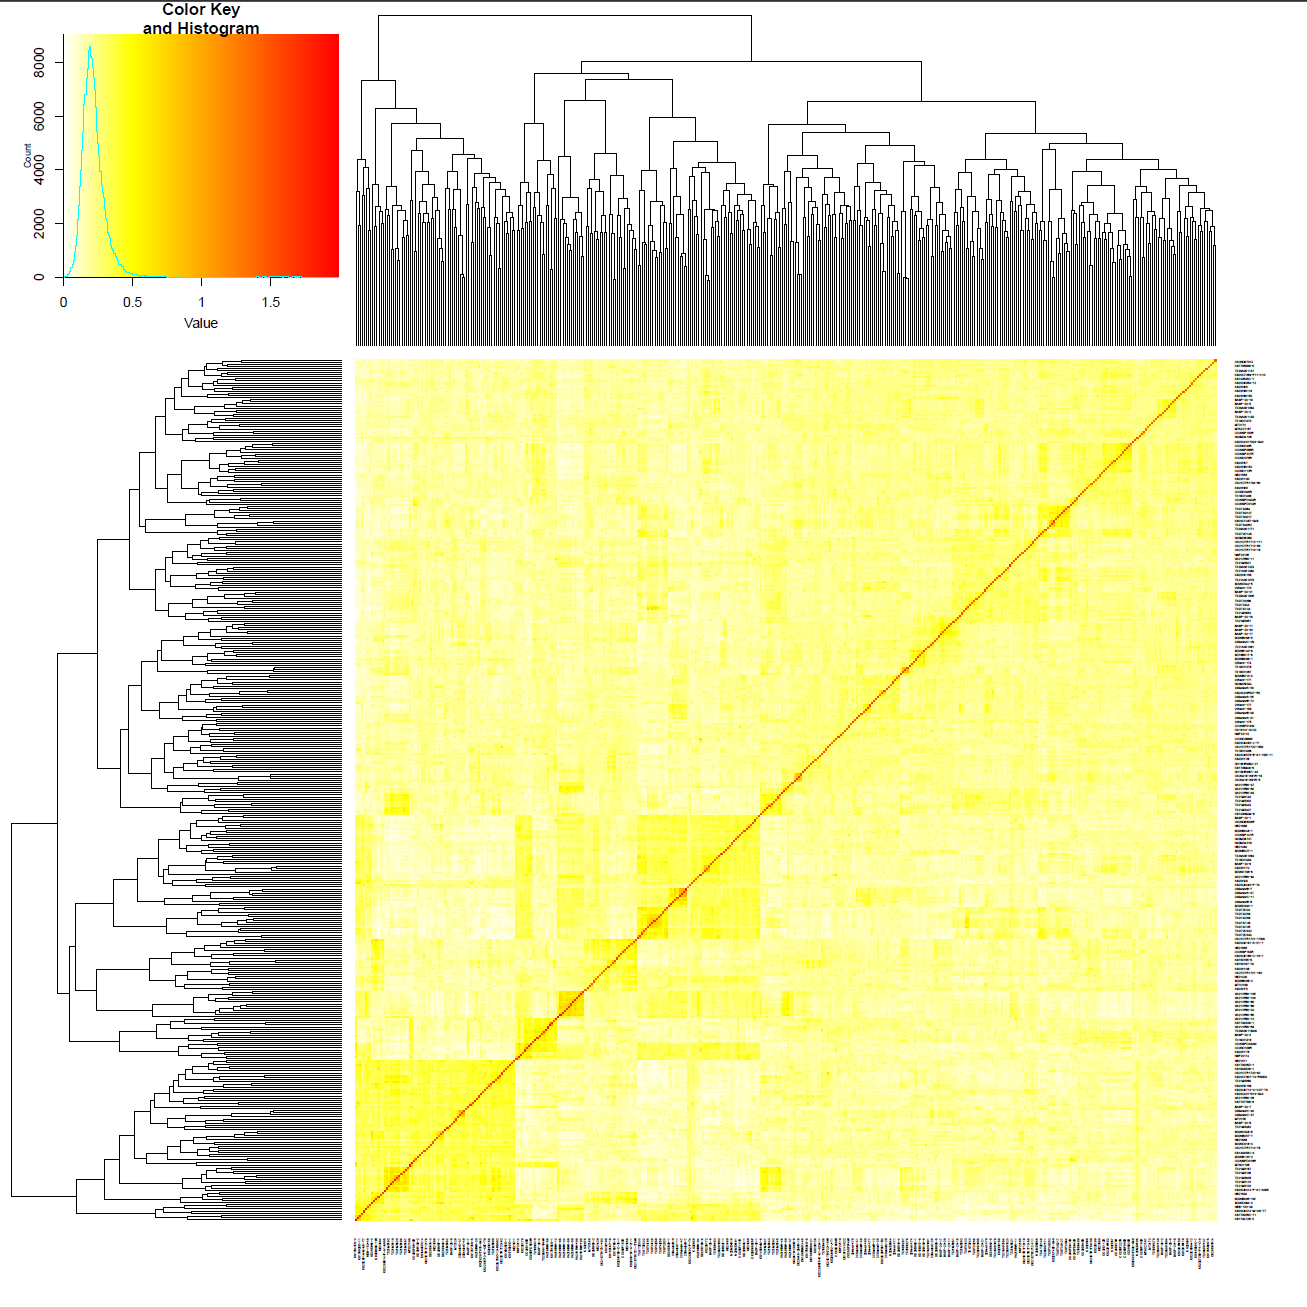


**Supplementary Figure 1**. Heatmap of the kinship matrix constructed from 15,368 high-quality SNP markers.

Red color indicate higher pairwise relatedness, whereas yellow color represent lower relatedness among genotypes. Hierarchical clustering dendrograms are shown along the top and left sides, illustrating the genetic relationships and grouping patterns among individuals. The color key and value distribution histogram are displayed in the upper-left corner.


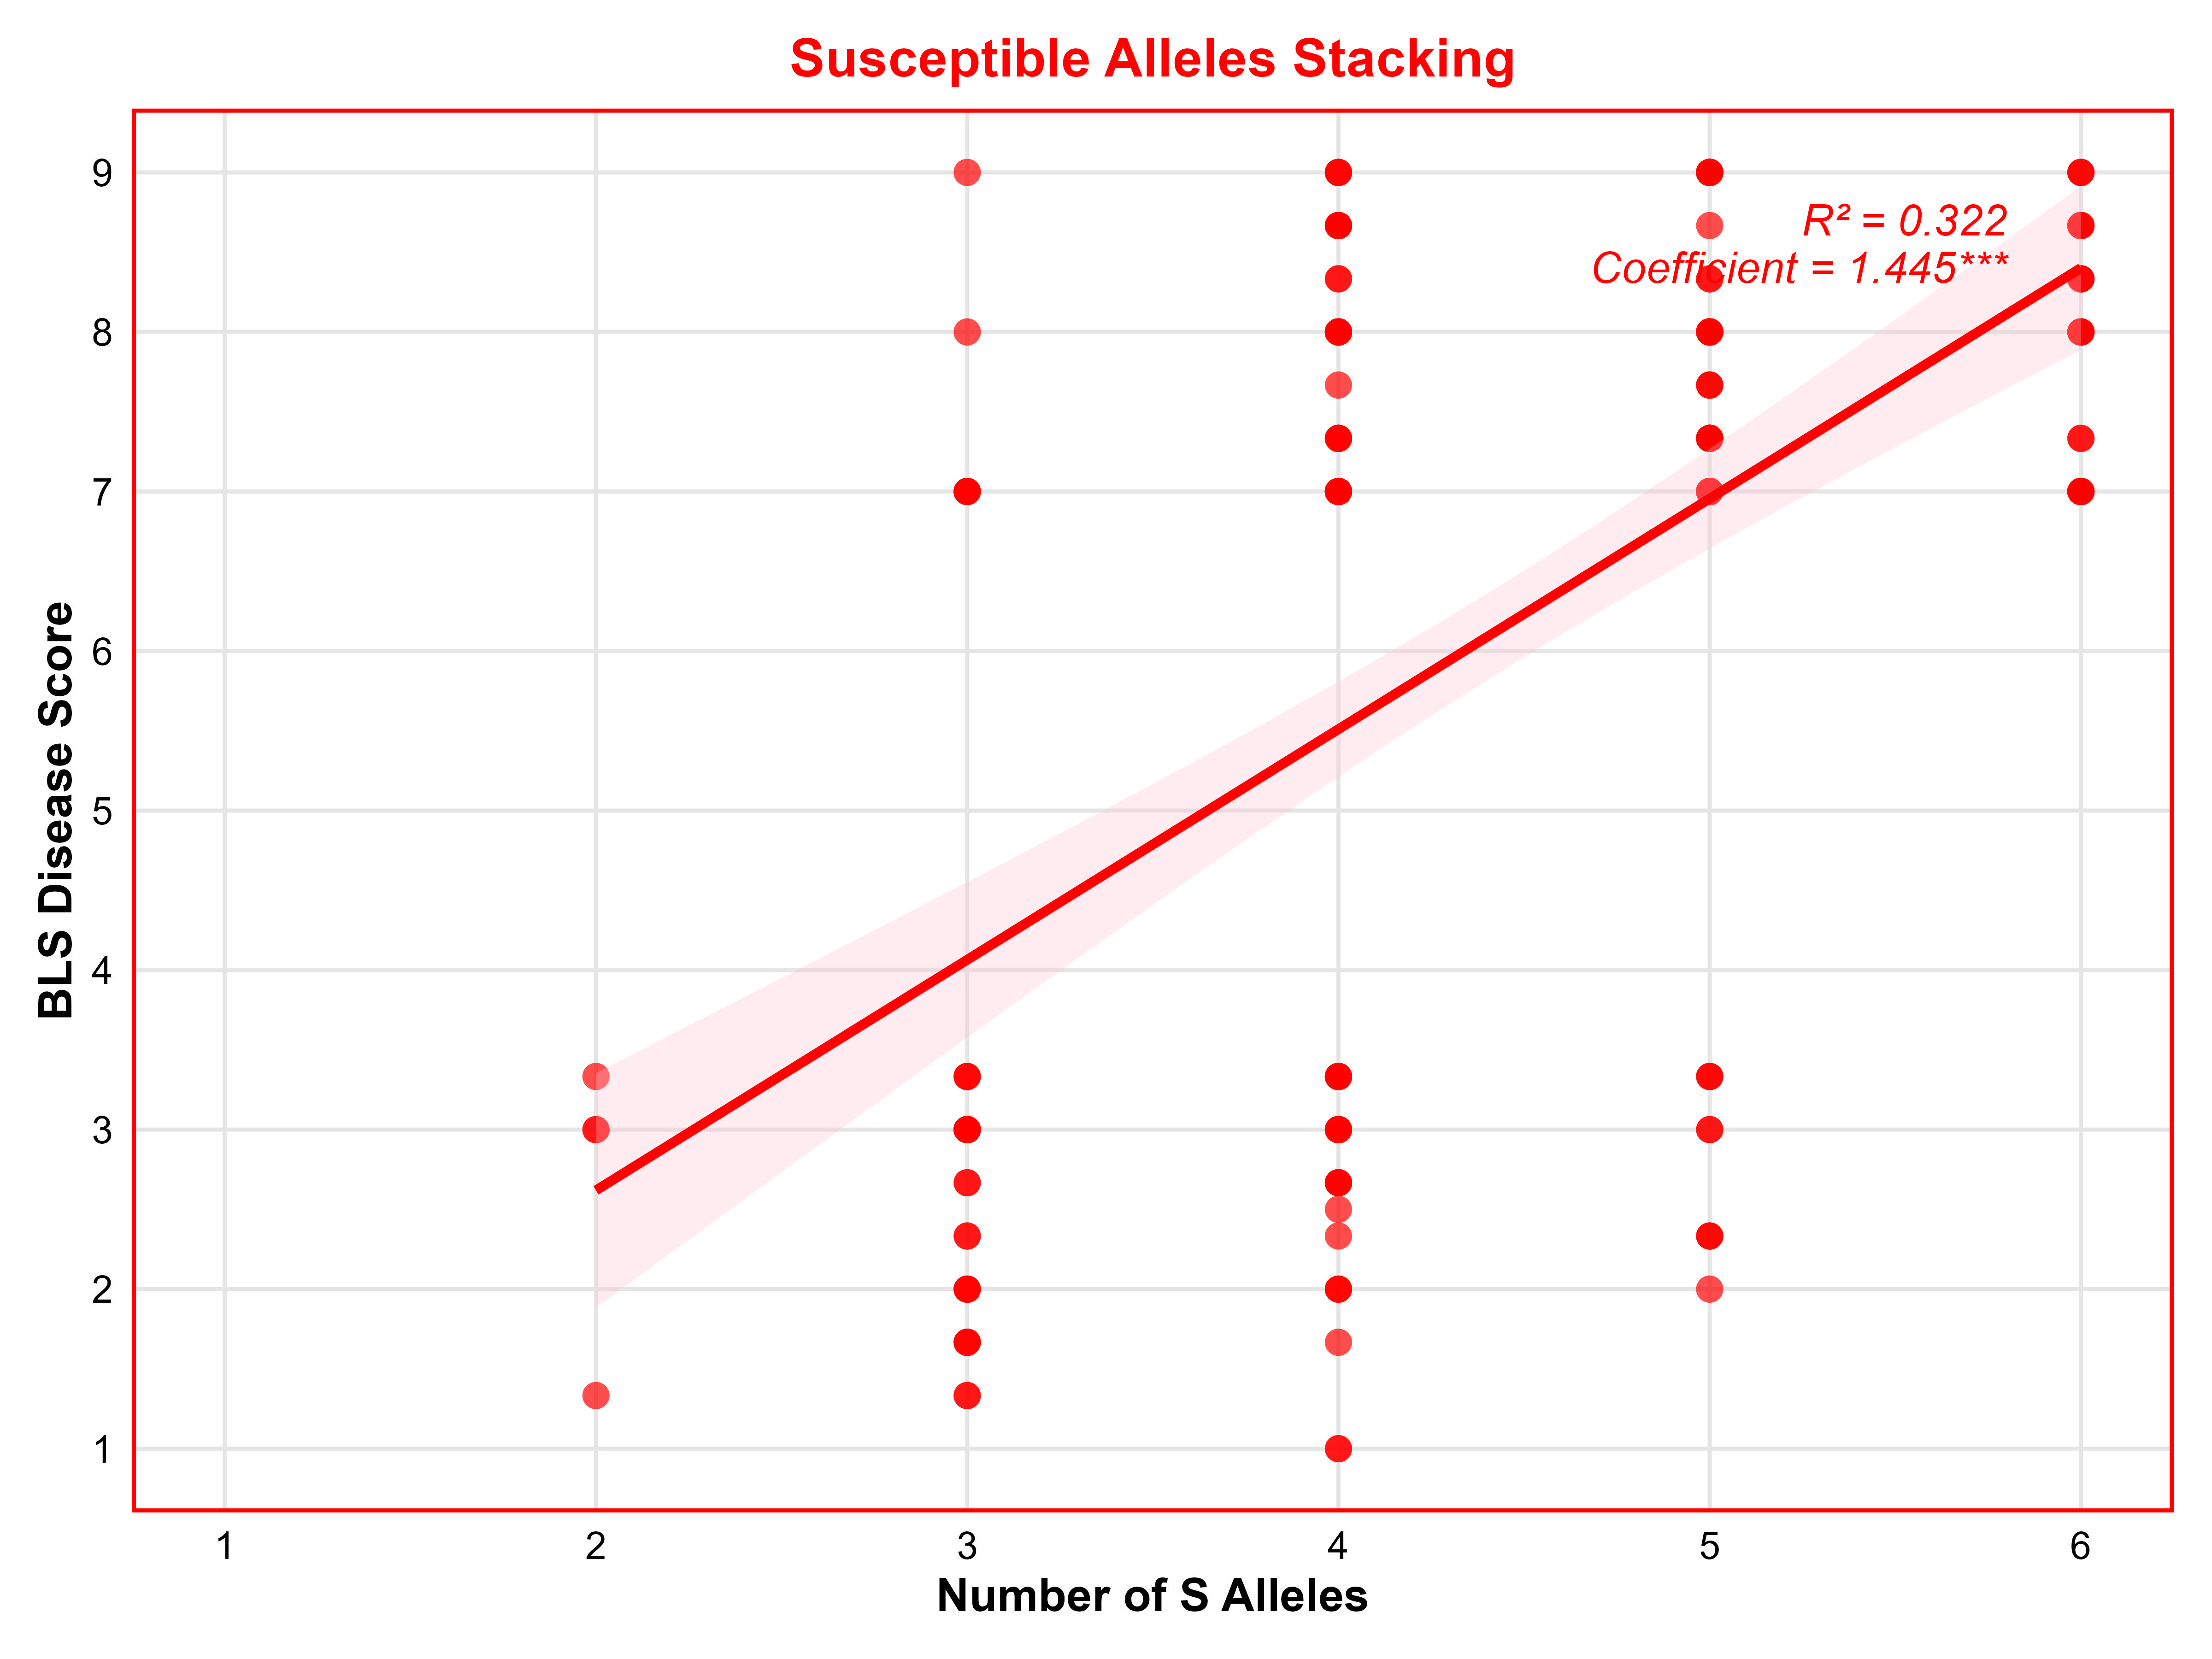


**Supplementary Figure 2**. Additive effects of identified MTAs on Bacterial Leaf Streak (BLS) disease severity. The x-axis depicts the number of Susceptible Loci and y-axis shows BLS disease severity on a scale of 1 to 9, where 1 is highly resistant and 9 is susceptible. The number of susceptible (S) alleles at the identified marker–trait associations (MTAs) showed clear additive effects on BLS disease score. Increasing S-allele was associated with increased disease severity, resulted in higher BLS scores. Lines indicate linear regression fit with 95% confidence intervals.

**Supplementary Table 3**: List of the highly resistant wheat breeding lines against bacterial leaf streak disease, with the corresponding favorable or resistant alleles at the significant MTAs detected in this study.

| Resistance allele |  | TT | AA | CC | CC | AA | AA | GG |
| --- | --- | --- | --- | --- | --- | --- | --- | --- |
| ID | BLS_score | S1B_372870844 | S2B_175365127 | S3B_625137880 | S3D_618866799 | S4A_440017300 | S4B_322341647 | S6B_548788571 |
| TX21M5528 | 2 | TT | CC | TT | CC | TT | AA | GG |
| TX21M5629 | 1.667 | GG | CC | TT | GG | TT | AA | GG |
| CO200034R | 1.667 | TT | AA | TT | GG | TT | AA | GG |
| 23SeniorA-48 | 2 | GG | AA | TT | GG | TT | AA | GG |
| KS22U6864-1H-1R-R2-A1 | 2 | GG | CC | TT | GG | AA | AA | GG |
| CO20SF227R | 1.333 | TT | AA | TT | GG | TT | AA | GG |
| TX21M5111 | 1 | TT | CC | TT | GG | TT | AA | GG |
| 23SeniorC-36 | 1.667 | GG | AA | CC | GG | TT | AA | GG |
| TX21M5477 | 1.667 | TT | AA | TT | GG | TT | AA | GG |
| TX21M5440 | 1 | TT | CC | TT | GG | TT | AA | GG |
| 22Nord-169 | 2.5 | GG | CC | CC | GG | TT | AA | GG |
| VA21HRW-39 | 2 | GG | CC | TT | GG | TT | AA | GG |
| CO20D068W | 2 | TT | CC | CC | GG | TT | AA | GG |
| CO20SF163R | 1.333 | GG | AA | CC | GG | TT | AA | GG |
| CO20D045R | 2 | TT | AA | TT | GG | TT | AA | GG |
| BASF-23-5 | 1.333 | GT | AA | TT | GG | TT | AA | GG |
| CO20D036R | 2.333 | TT | CC | TT | GG | TT | AA | GG |
